# Supplementary material
Source: publisher site journal article supplement (https://www.dovepress.com/article/298499)
Supplement: Supplementary file 1 [file get_supplementary_file.php]

| TableS1 Results of mixed linear regression models on the associations of serum HOMA-IR and hsCRP levels with number of MetS components in all twins | | | | | | | |
| --- | --- | --- | --- | --- | --- | --- | --- |
| **Exposure** | **N** | **Model 1** | | **Model 2** | | **Model 3** | |
| **β (95% CI)** | ***p*** | **β (95% CI)** | ***p*** | **β (95% CI)** | ***p*** |
| **HOMA-IR** |  |  |  |  |  |  |  |
| Number of MetS components |  |  |  |  |  |  |  |
| 0 | 47 |  |  |  |  |  |  |
| 1 | 280 | 0.16(-0.04,0.36) | 0.110 | 0.16(-0.04,0.36) | 0.127 | 0.08(-0.11,0.26) | 0.410 |
| 2 | 366 | 0.44(0.24,0.64) | <0.001 | 0.44(0.24,0.65) | <0.001 | 0.24(0.06,0.43) | 0.011 |
| 3 | 312 | 0.80(0.60,1.00) | <0.001 | 0.80(0.59,1.01) | <0.001 | 0.50(0.30,0.69) | <0.001 |
| 4 | 108 | 1.17(0.95,1.40) | <0.001 | 1.18(0.94,1.41) | <0.001 | 0.80(0.59,1.02) | <0.001 |
| *P* for trend |  | <0.001 |  | <0.001 |  | <0.001 |  |
|  |  |  |  |  |  |  |  |
|  |  |  |  |  |  |  |  |
| **hsCRP** |  |  |  |  |  |  |  |
| Number of MetS components |  |  |  |  |  |  |  |
| 0 | 47 |  |  |  |  |  |  |
| 1 | 280 | 0.12(-0.18,0.42) | 0.440 | 0.10(-0.21,0.41) | 0.521 | 0.02(-0.28,0.31) | 0.916 |
| 2 | 366 | 0.35(0.05,0.66) | 0.024 | 0.35(0.04,0.67) | 0.026 | 0.15(-0.16,0.45) | 0.339 |
| 3 | 312 | 0.51(0.20,0.82) | 0.001 | 0.48(0.16,0.80) | 0.003 | 0.21(-0.11,0.52) | 0.195 |
| 4 | 108 | 0.64(0.30,0.98) | <0.001 | 0.61(0.26,0.96) | 0.001 | 0.28(-0.07,0.63) | 0.118 |
| *P* for trend |  | 0.028 |  | 0.030 |  | 0.041 |  |
| Model 1 was adjusted for sex, zygosity, place and age; model 2 was adjusted for model 1 plus lifestyle factors (smoking, drinking, and physical activity); model 3 was adjusted for model 2 plus BMI, BFR and WHR. | | | | | | | |
| Abbreviations: HOMA-IR=homeostasis model assessment of insulin resistance; hsCRP=high-sensitivity CRP; MetS=metabolic syndrome. | | | | | | |  |

| TableS2 Results of mixed linear regression models on the associations of serum HOMA-IR and hsCRP levels with number of MetS components in obesity twins | | | | | | | |
| --- | --- | --- | --- | --- | --- | --- | --- |
| **Exposure** | **N** | **Model 1** | | **Model 2** | | **Model 3** | |
| **β (95% CI)** | ***p*** | **β (95% CI)** | ***p*** | **β (95% CI)** | ***p*** |
| **HOMA-IR** |  |  |  |  |  |  |  |
| **Number of MetS components** |  |  |  |  |  |  |  |
| 0 | 11 |  |  |  |  |  |  |
| 1 | 83 | 0.38(-0.04,0.80) | 0.078 | 0.52(0.07,0.98) | 0.024 | 0.36(-0.07,0.79) | 0.100 |
| 2 | 145 | 0.56(0.14,0.98) | 0.009 | 0.72(0.26,1.18) | 0.002 | 0.50(0.07,0.93) | 0.024 |
| 3 | 157 | 0.79(0.36,1.21) | <0.001 | 0.95(0.49,1.40) | <0.001 | 0.72(0.28,1.15) | 0.001 |
| 4 | 67 | 1.11(0.67,1.55) | <0.001 | 1.31(0.83,1.79) | <0.001 | 1.05(0.60,1.51) | <0.001 |
| *P* for trend |  | <0.001 |  | <0.001 |  | <0.001 |  |
|  |  |  |  |  |  |  |  |
| **hsCRP** |  |  |  |  |  |  |  |
| **Number of MetS components** |  |  |  |  |  |  |  |
| 0 | 11 |  |  |  |  |  |  |
| 1 | 83 | 0.65(0.07,1.24) | 0.029 | 0.78(0.17,1.40) | 0.012 | 0.65(0.06,1.23) | 0.031 |
| 2 | 145 | 0.73(0.15,1.31) | 0.014 | 0.87(0.26,1.48) | 0.005 | 0.68(0.09,1.27) | 0.024 |
| 3 | 157 | 0.84(0.26,1.43) | 0.005 | 0.95(0.24,1.57) | 0.002 | 0.76(0.17,1.36) | 0.012 |
| 4 | 67 | 0.89(0.28,1.50) | 0.004 | 0.94(0.30,1.58) | 0.004 | 0.72(0.10,1.34) | 0.023 |
| *P* for trend |  | 0.048 |  | 0.061 |  | 0.065 |  |
| Model 1 was adjusted for sex, zygosity, place and age; model 2 was adjusted for model 1 plus lifestyle factors (smoking, drinking, and physical activity); model 3 was adjusted for model 2 plus BMI, BFR and WHR, model 4was adjusted for model 3 plus HbA1c, TC. | | | | | | | |
| Abbreviations: HOMA-IR=homeostasis model assessment of insulin resistance; hsCRP=high-sensitivity CRP; MetS=metabolic syndrome. | | | | | | |  |

| TableS3 Results of mixed linear regression models on the associations of serum HOMA-IR and hsCRP levels with number of MetS components in non-obesity twins | | | | | | | |
| --- | --- | --- | --- | --- | --- | --- | --- |
| **Exposure** | **N** | **Model 1** | | **Model 2** | | **Model 3** | |
| **β (95% CI)** | ***p*** | **β (95% CI)** | ***p*** | **β (95% CI)** | ***p*** |
| **HOMA-IR** |  |  |  |  |  |  |  |
| Number of MetS components |  |  |  |  |  |  |  |
| 0 | 36 |  |  |  |  |  |  |
| 1 | 197 | 0.07(-0.14,0.27) | 0.531 | 0.04(-0.18,0.26) | 0.726 | 0.08(-0.13,0.28) | 0.461 |
| 2 | 221 | 0.32(0.10,0.54) | 0.004 | 0.31(0.08,0.53) | 0.008 | 0.25(0.04,0.46) | 0.021 |
| 3 | 155 | 0.70(0.47,0.92) | <0.001 | 0.67(0.44,0.91) | <0.001 | 0.50(0.28,0.73) | <0.001 |
| 4 | 41 | 1.02(0.75,1.29) | <0.001 | 1.00(0.71,1.27) | <0.001 | 0.77(0.51,1.04) | <0.001 |
| *P* for trend |  | <0.001 |  | <0.001 |  | <0.001 |  |
|  |  |  |  |  |  |  |  |
|  |  |  |  |  |  |  |  |
| **hsCRP** |  |  |  |  |  |  |  |
| Number of MetS components |  |  |  |  |  |  |  |
| 0 | 36 |  |  |  |  |  |  |
| 1 | 197 | -0.13(-0.48,0.22) | 0.477 | -0.18(-0.53,0.17) | 0.318 | -0.18(-0.53,0.17) | 0.316 |
| 2 | 221 | 0.09(-0.27,0.46) | 0.606 | 0.10(-0.26,0.47) | 0.573 | 0.04(-0.32,0.40) | 0.835 |
| 3 | 155 | 0.21(-0.17,0.58) | 0.274 | 0.20(-0.17,0.57) | 0.305 | 0.09(-0.29,0.47) | 0.648 |
| 4 | 41 | 0.42(-0.03,0.87) | 0.066 | 0.46(0.01,0.91) | 0.043 | 0.31(-0.14,0.77) | 0.175 |
| *P* for trend |  | 0.044 |  | 0.047 |  | 0.058 |  |
| Model 1 was adjusted for sex, zygosity, place and age; model 2 was adjusted for model 1 plus lifestyle factors (smoking, drinking, and physical activity); model 3 was adjusted for model 2 plus BMI, BFR and WHR, model 4was adjusted for model 3 plus HbA1c, TC. | | | | | | | |
| Abbreviations: HOMA-IR=homeostasis model assessment of insulin resistance; hsCRP=high-sensitivity CRP; MetS=metabolic syndrome.  TableS4 Results of mixed linear regression models on the association of serum HOMA-IR and CRP levels with metabolic/obesity phenotypes in all twins stratified by age.   | **Exposure** | **Age≤45** | | **Age>45** | | **Interaction** | | --- | --- | --- | --- | --- | --- | | **β (95% CI)** | ***p*** | **β (95% CI)** | ***p*** | ***P*** | | **HOMA-IR** |  |  |  |  |  | | **Metabolic/obesity phenotype** |  |  |  |  |  | | MHNO (ref) |  |  |  |  |  | | MUNO | 0.51(0.34,0.68) | <0.001 | 0.30(0.13,0.46) | <0.001 | 0.500 | | MHO | 0.59(0.33,0.84) | <0.001 | 0.44(0.24,0.63) | <0.001 | 0.761 | | MUO | 0.90(0.72,1.08) | <0.001 | 0.68(0.52,0.85) | <0.001 | 0.201 | |  |  |  |  |  |  | | **hsCRP** |  |  |  |  |  | | **Metabolic/obesity phenotype** |  |  |  |  |  | | MHNO (ref) |  |  |  |  |  | | MUNO | 0.30(0.06,0.54) | 0.018 | 0.23(-0.02,0.46) | 0.067 | 0.326 | | MHO | 0.62(0.25,0.98) | <0.001 | 0.57(0.28,0.86) | <0.001 | 0.579 | | MUO | 0.63(0.37,0.86) | <0.001 | 0.64(0.38,0.88) | <0.001 | 0.776 | | | | | | | |  |

Model was adjusted for sex, zygosity, place and age, lifestyle factors (smoking status, drinking status, and MET values), TC and HA1bc.

Abbreviations: HOMA-IR=homeostasis model assessment of insulin resistance; hsCRP=high-sensitivity CRP; MetS=metabolic syndrome;

MHO = metabolically healthy obesity; MUO = metabolically unhealthy obesity; MHNO = metabolically healthy non-obesity; MUNO = metabolically unhealthy non-obesity; TC=total cholesterol.

| Table S5 Results of fixed linear regression models on the association of serum HOMA-IR and hsCRP levels with metabolic status in reared together twin pairs | | | | | | | | |
| --- | --- | --- | --- | --- | --- | --- | --- | --- |
| **Exposure** | **MZ** | | **DZ** | |  |  |  |  |
| **β (95% CI)** | **p** | **β (95% CI)** | **p** |  |  |  |  |
| **HOMA-IR** |  |  |  |  |  |  |  |  |
| **Metabolic status** |  |  |  |  |  |  |  |  |
| MH(reference group) |  |  |  |  |  |  |  |  |
| MU | 0.16(-0.01,0.32) | 0.063 | 0.26(0.04,0.47) | 0.022 |  |  |  |  |
| **Metabolic status in obesity** |  |  |  |  |  |  |  |  |
| MHO(ref) |  |  |  |  |  |  |  |  |
| MUO | -0.06(-0.44,0.32) | 0.769 | 0.72(0.22,1.22) | 0.007 |  |  |  |  |
| **CRP** |  |  |  |  |  |  |  |  |
| **Metabolic status** |  |  |  |  |  |  |  |  |
| MH(reference group) |  |  |  |  |  |  |  |  |
| MU | -0.03(-0.37,0.31) | 0.860 | 0.30(-0.01,0.61) | 0.056 |  |  |  |  |
| **Metabolic status in obesity** |  |  |  |  |  |  |  |  |
| MHO(ref) |  |  |  |  |  |  |  |  |
| MUO | 0.00(-0.61,0.61) | 0.989 | -0.14(-0.91,0.63) | 0.707 |  |  |  |  |
| Models were adjusted for lifestyle factors (smoking status, drinking status, and MET values), BMI, PBF and WHR. | | | | |  |  |  |  |
| Abbreviations: HOMA-IR=homeostasis model assessment of insulin resistance; hsCRP=high-sensitivity CRP; MH = metabolically healthy; MU = metabolically unhealthy; MHO = metabolically healthy obesity; MUO = metabolically unhealthy obesity; BMI = body mass index; PBF=percent body fat; WHR=waist hip ratio. | | | | |  |  |  |  |

| Table S6 Results of fixed linear regression models on the associations of serum HOMA-IR and hsCRP levels with number of MetS components in twin pairs | | | | |
| --- | --- | --- | --- | --- |
| **Exposure** | **MZ** | | **DZ** | |
| **β (95% CI)** | **p** | **β (95% CI)** | **p** |
| **HOMA-IR** |  |  |  |  |
| **All twins** |  |  |  |  |
| Number of MetS components |  |  |  |  |
| 0 |  |  |  |  |
| 1 | 0.07(-0.24,0.38) | 0.658 | -0.15(-0.60,0.30) | 0.517 |
| 2 | 0.17(-0.17,0.51) | 0.328 | 0.02(-0.45,0.48) | 0.941 |
| 3 | 0.39(0.04,0.75) | 0.030 | 0.24(-0.25,0.74) | 0.332 |
| 4 | 0.68(0.29,1.09) | 0.010 | 0.60(0.06,1.14) | 0.029 |
| Obesity twins |  |  |  |  |
| Number of MetS components |  |  |  |  |
| 0 |  |  |  |  |
| 1 | 0.48(-0.34,1.30) | 0.249 | - | - |
| 2 | 0.30(-0.61,1.21) | 0.514 | 0.60(0.09,1.10) | 0.023 |
| 3 | 0.58(-0.35,1.51) | 0.217 | 0.60(0.08,1.12) | 0.025 |
| 4 | 0.92(-0.05,1.89) | 0.060 | 1.28(0.57,2.18) | 0.002 |
| **hsCRP** |  |  |  |  |
| **All twins** |  |  |  |  |
| Number of MetS components |  |  |  |  |
| 0 |  |  |  |  |
| 1 | -0.08(-0.69,0.53) | 0.800 | -0.18(-0.88,0.51) | 0.606 |
| 2 | -0.08(-0.74,0.59) | 0.822 | 0.02(-0.70,0.74) | 0.966 |
| 3 | -0.05(-0.74,0.64) | 0.889 | -0.16(-0.93,0.61) | 0.680 |
| 4 | -0.28(-1.05,0.48) | 0.474 | 0.09(-0.75,0.93) | 0.837 |
| **Obesity twins** |  |  |  |  |
| Number of MetS components |  |  |  |  |
| 0 |  |  |  |  |
| 1 | 0.13(-1.12,1.37) | 0.838 | 2.31(-0.06,4.69) | 0.055 |
| 2 | 0.14(-1.23,1.51) | 0.836 | 1.95(-0.41,4.31) | 0.100 |
| 3 | 0.03(-1.37,1.43) | 0.964 | 1.83(-0.57,4.23) | 0.127 |
| 4 | -0.16(-1.61,1.29) | 0.825 | 2.39(-0.21,4.99) | 0.070 |
| Models were adjusted for lifestyle factors (smoking, drinking and physical activity), BMI, BFR and WHR. | | | | |
| Abbreviations: MZ=monozygotic; DZ=dizygotic; MetS=metabolic syndrome; HOMA-IR=homeostasis model assessment of insulin resistance; hsCRP=high-sensitivity CRP; MetS=metabolic syndrome. | | | | |

| Table S7 Results of fixed linear regression models on the association of serum HOMA-IR and hsCRP levels with metabolic/obesity phenotypes in reared together twin pairs | | | | | | |
| --- | --- | --- | --- | --- | --- | --- |
| **Exposure** | **MZ** | | **DZ** | |  |  |
| **β (95% CI)** | ***p*** | **β (95% CI)** | ***p*** |  |  |
| **HOMA-IR** |  |  |  |  |  |  |
| **Metabolic/obesity phenotype** |  |  |  |  |  |  |
| MHNO (ref) |  |  |  |  |  |  |
| MUNO | 0.44(0.24,0.65) | <0.001 | 0.47(0.19,0.75) | 0.001 |  |  |
| MHO | 0.64(0.34,0.95) | <0.001 | 0.46(0.11,0.81) | 0.011 |  |  |
| MUO | 0.61(0.39,0.82) | <0.001 | 0.92(0.63,1.21) | <0.001 |  |  |
|  |  |  |  |  |  |  |
| **HsCRP** |  |  |  |  |  |  |
| **Metabolic/obesity phenotype** |  |  |  |  |  |  |
| MHNO (ref) |  |  |  |  |  |  |
| MUNO | 0.23(-0.15,0.62) | 0.239 | 0.48(0.11,0.84) | 0.010 |  |  |
| MHO | 0.76(0.20,1.33) | 0.008 | 0.62(0.17,1.07) | 0.007 |  |  |
| MUO | 0.48(0.07,0.89) | 0.021 | 0.76(0.39,1.13) | <0.001 |  |  |
| Models were adjusted for lifestyle factors (smoking status, drinking status, and MET values). | | | | |  |  |
| Abbreviations: MZ=monozygotic; DZ=dizygotic; HOMA-IR=homeostasis model assessment of insulin resistance; hsCRP=high-sensitivity CRP; MetS=metabolic syndrome; MHO = metabolically healthy obesity; MUO = metabolically unhealthy obesity; MHNO = metabolically healthy non-obesity; MUNO = metabolically unhealthy non-obesity. | | | | |  |  |
